# Supplementary material for: Electron transfer induced magnetic ordering of metal-cyanide magnets
Source: Royal Society of Chemistry journal article supplement (doi:10.1039/d0ma00173b), 2020-01-01
Supplement: d0ma00173b1.pdf [file d0ma00173b1.pdf]

## Supporting Information

# Electron transfer induced magnetic ordering of metal-cyanide magnets

*Yulong Huang,<sup>†</sup> Yong Hu,<sup>†</sup> Lu An,<sup>†</sup> Zheng Li,<sup>†</sup> Jason N. Armstrong,<sup>†</sup> and Shenqiang Ren<sup>†, ‡,\*</sup>*

<sup>†</sup> Department of Mechanical and Aerospace Engineering, University at Buffalo, The State University of New York, Buffalo, NY, 14260, USA

<sup>‡</sup> Department of Chemistry, University at Buffalo, The State University of New York, Buffalo, NY, 14260, USA

<sup>⊥</sup> Research and Education in eNergy, Environment and Water (RENEW) Institute, University at Buffalo, The State University of New York, Buffalo, NY, 14260, USA.

### **Corresponding Author**

\*E-mail: shenren@buffalo.edu.

Table S1. The stoichiometry  $y$  in all  $\text{Fe}(\text{TCNE})_y$  samples of different synthesis temperature of 368 K and 410 K.

|              |                          |            |            |            |            |
|--------------|--------------------------|------------|------------|------------|------------|
| <b>368 K</b> | <b>n<br/>(TCNE/mmol)</b> | <b>0.4</b> | <b>0.8</b> | <b>3.2</b> |            |
|              | <b>y</b>                 | 0.19       | 0.88       | 1.00       |            |
| <b>410 K</b> | <b>n<br/>(TCNE/mmol)</b> | <b>0.8</b> | <b>1.6</b> | <b>3.2</b> | <b>6.4</b> |
|              | <b>y</b>                 | 1.02       | 1.67       | 3.75       | 5.59       |

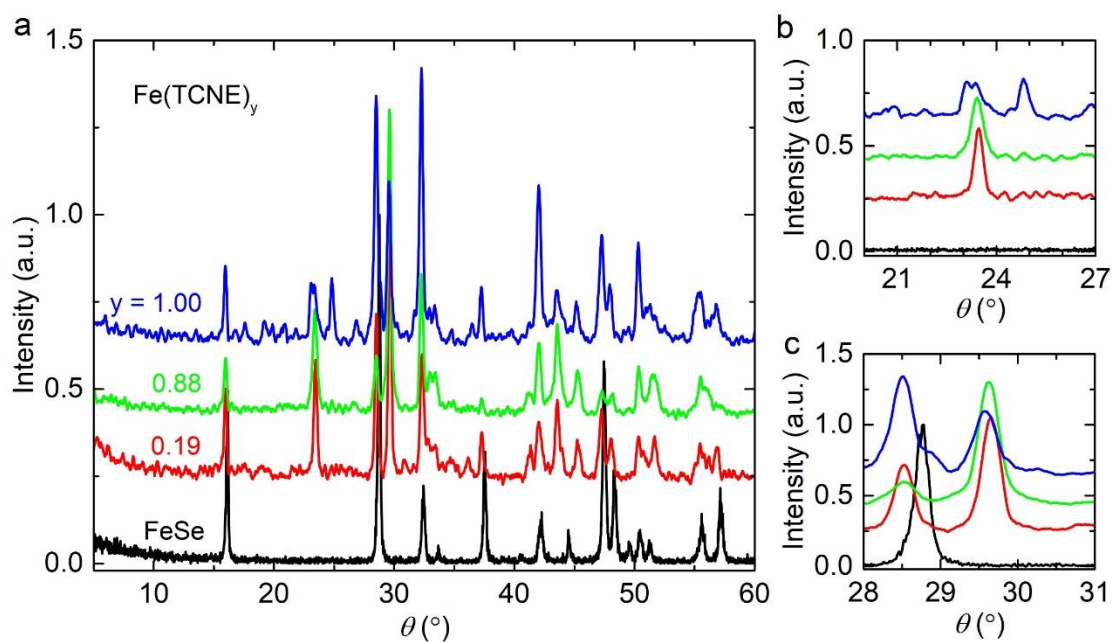

Figure S1. X-ray diffraction patterns (XRD) of  $\text{Fe(TCNE)}_y$  synthesized at 368 K by FeSe template. (a) The whole XRD patterns from  $5^\circ$  to  $60^\circ$  show the structure evolution from FeSe to  $\text{Fe(TCNE)}_y$  due to the Se substitution by TCNE. (b) New XRD peaks at around  $24^\circ$  of  $\text{Fe(TCNE)}_y$  differ from that of FeSe. (c) Peak split at  $29^\circ$  identifies the new structure emerging during the substitution reaction.

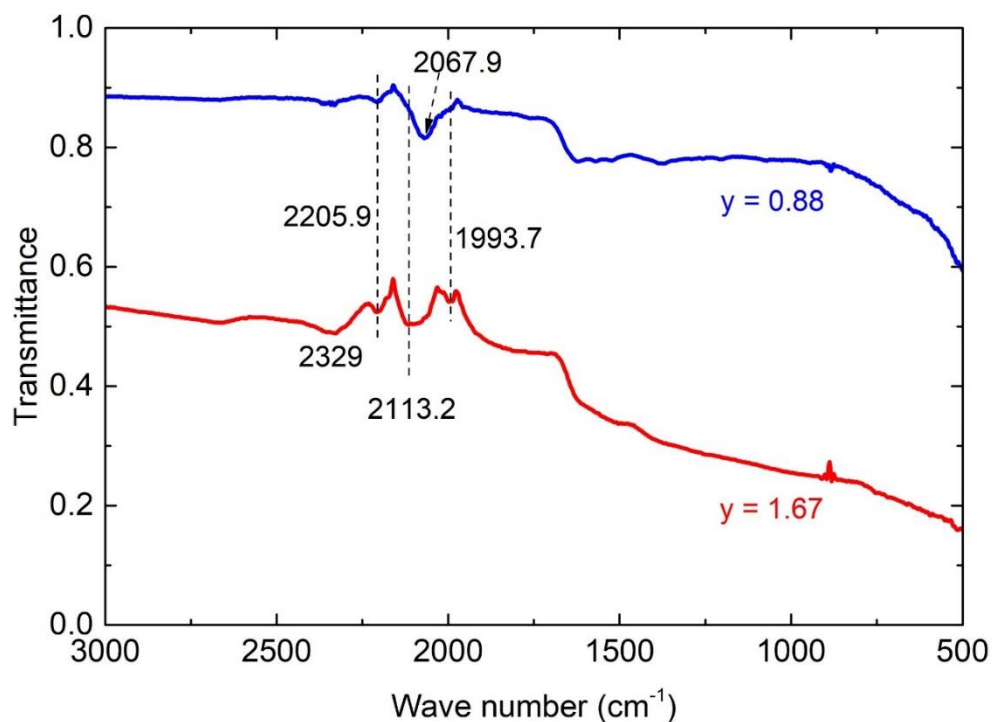

Figure S2. Infrared (IR) transmittance of  $\text{Fe(TCNE)}_y$  ( $y=0.88$ ) at room temperature.

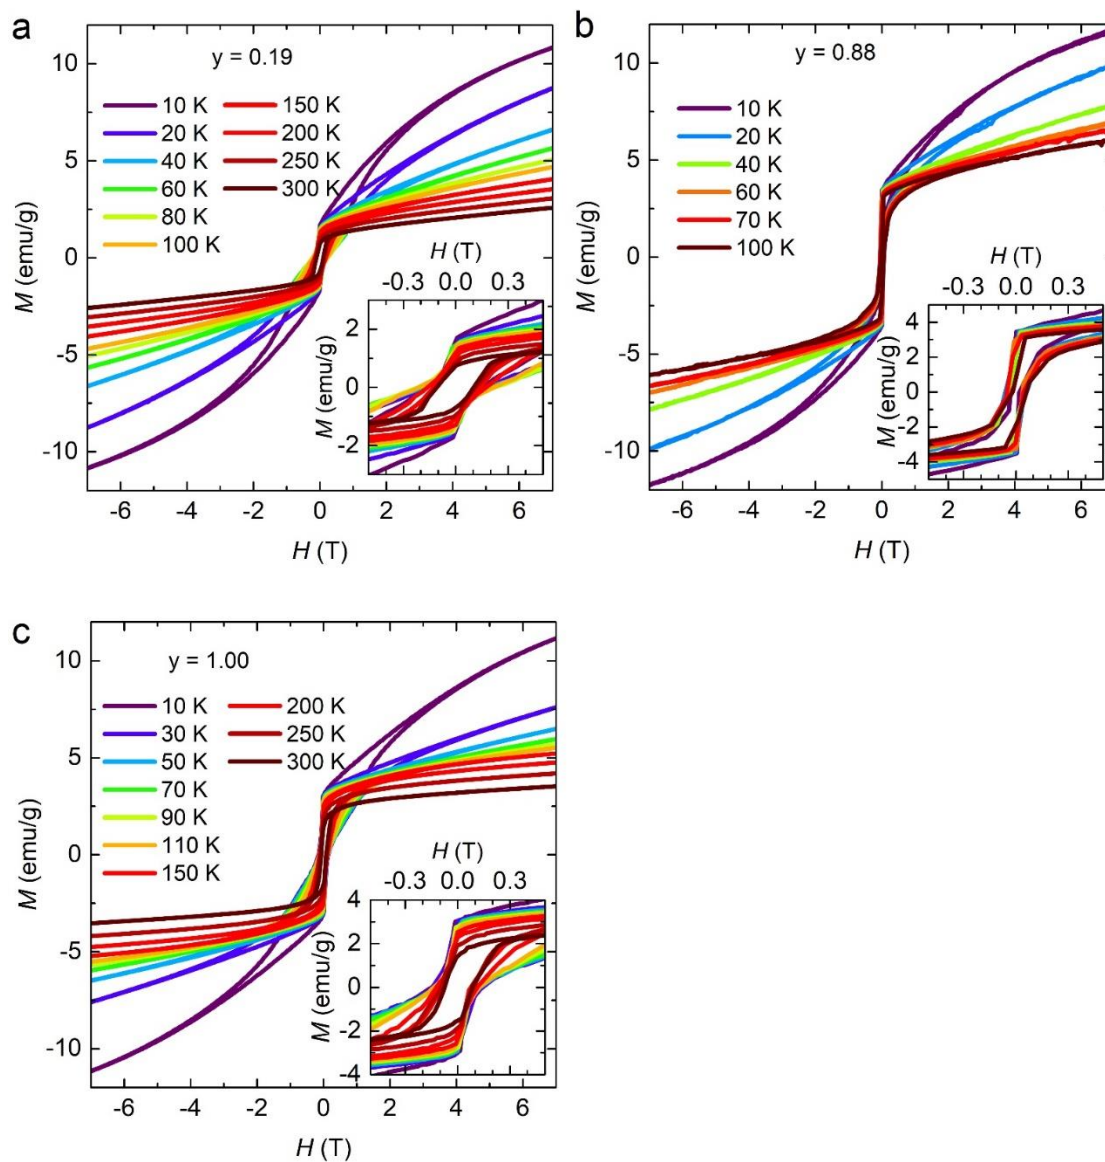

Figure S3. Magnetic field dependent of magnetization of  $\text{Fe}(\text{TCNE})_y$  ( $y = 0.19, 0.88$  and  $1.00$ ) synthesized at 368 K.

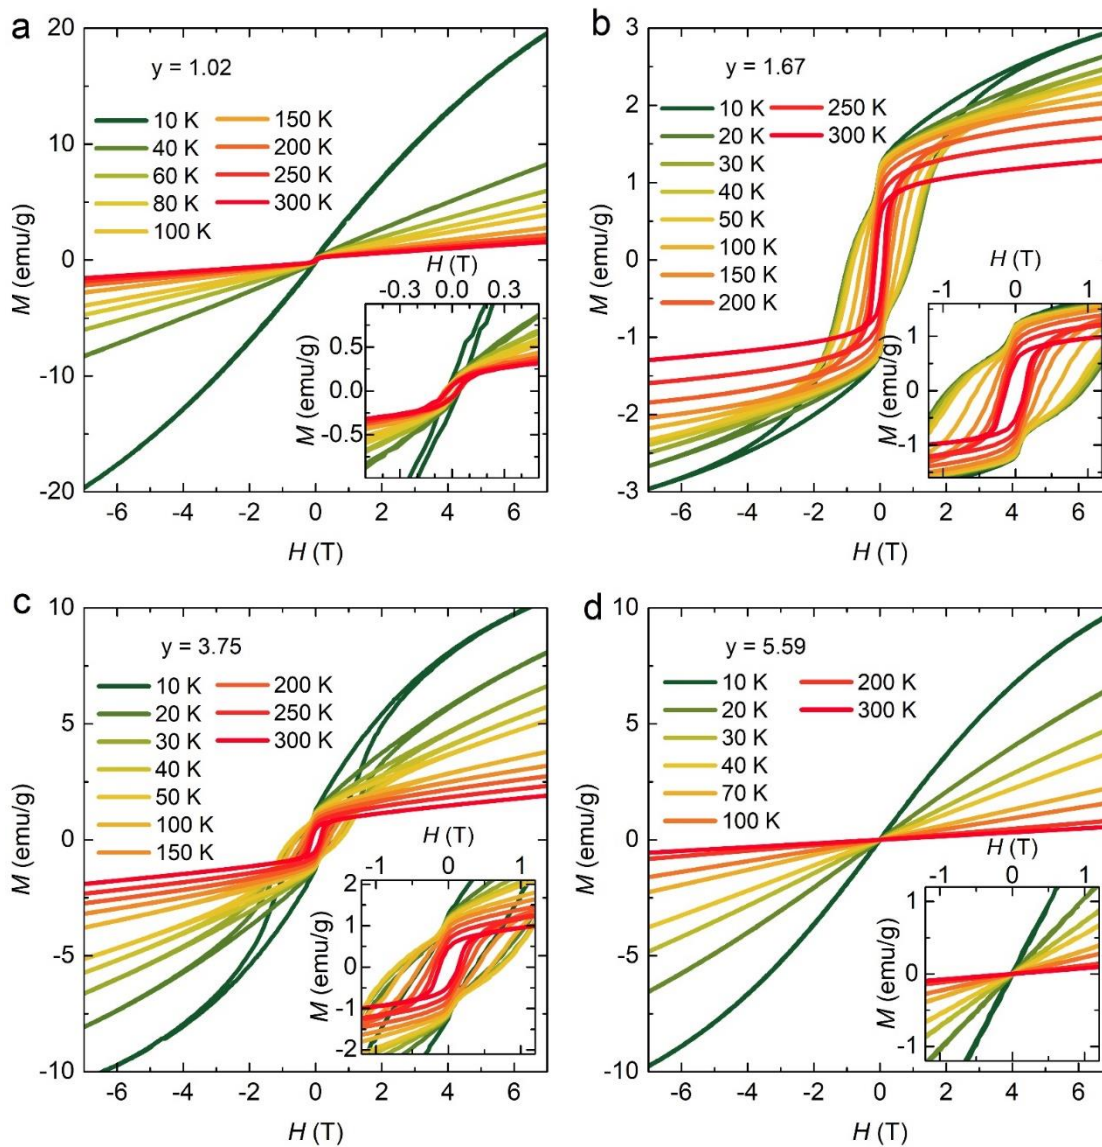

Figure S4. Magnetic field dependent of magnetization of  $\text{Fe}(\text{TCNE})_y$  ( $y = 1.02, 1.67, 3.75$  and  $5.59$ ) synthesized at 410 K.

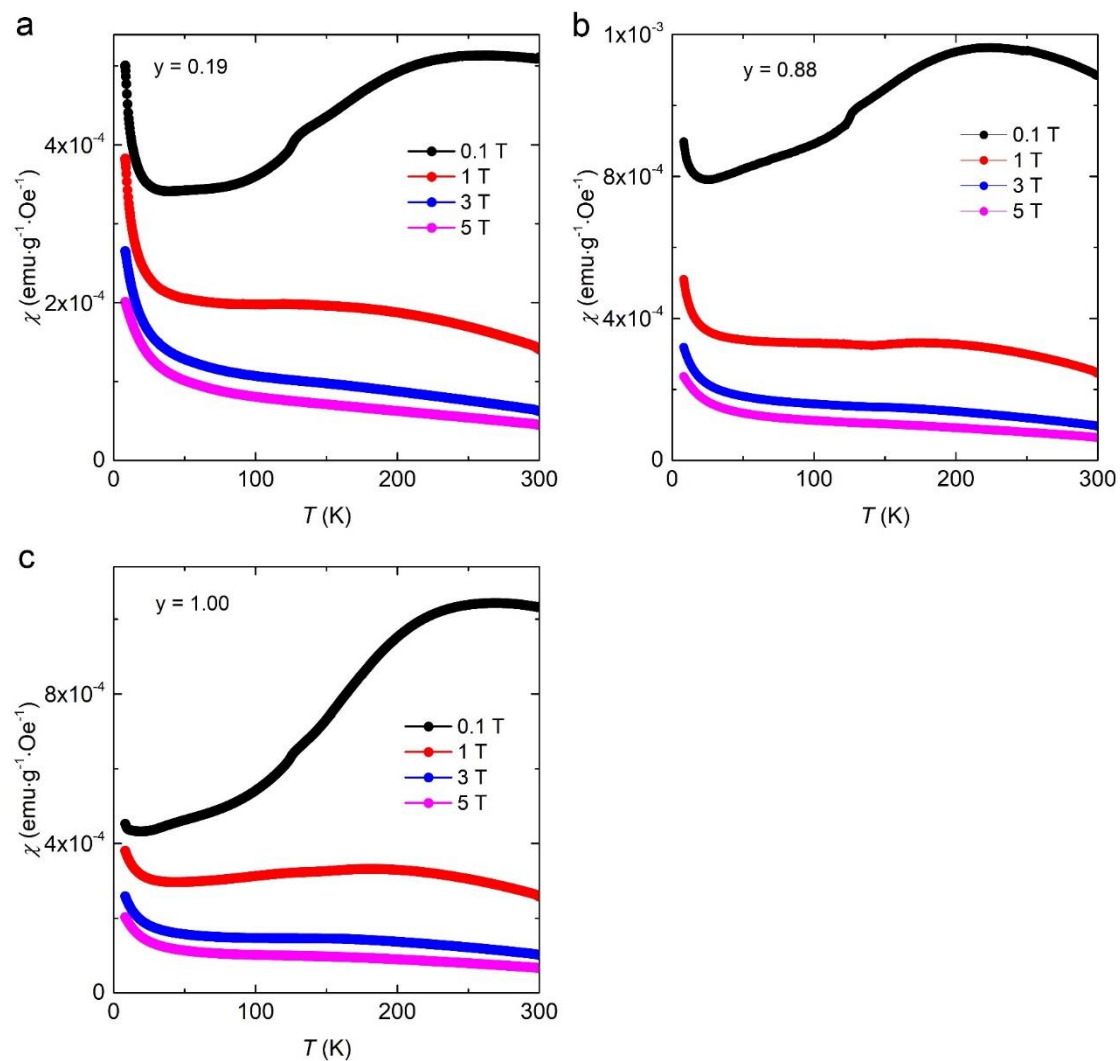

Figure S5. Temperature dependent of magnetic susceptibility of  $\text{Fe}(\text{TCNE})_y$  ( $y = 0.19, 0.88$  and  $1.00$ ) synthesized at 368 K.

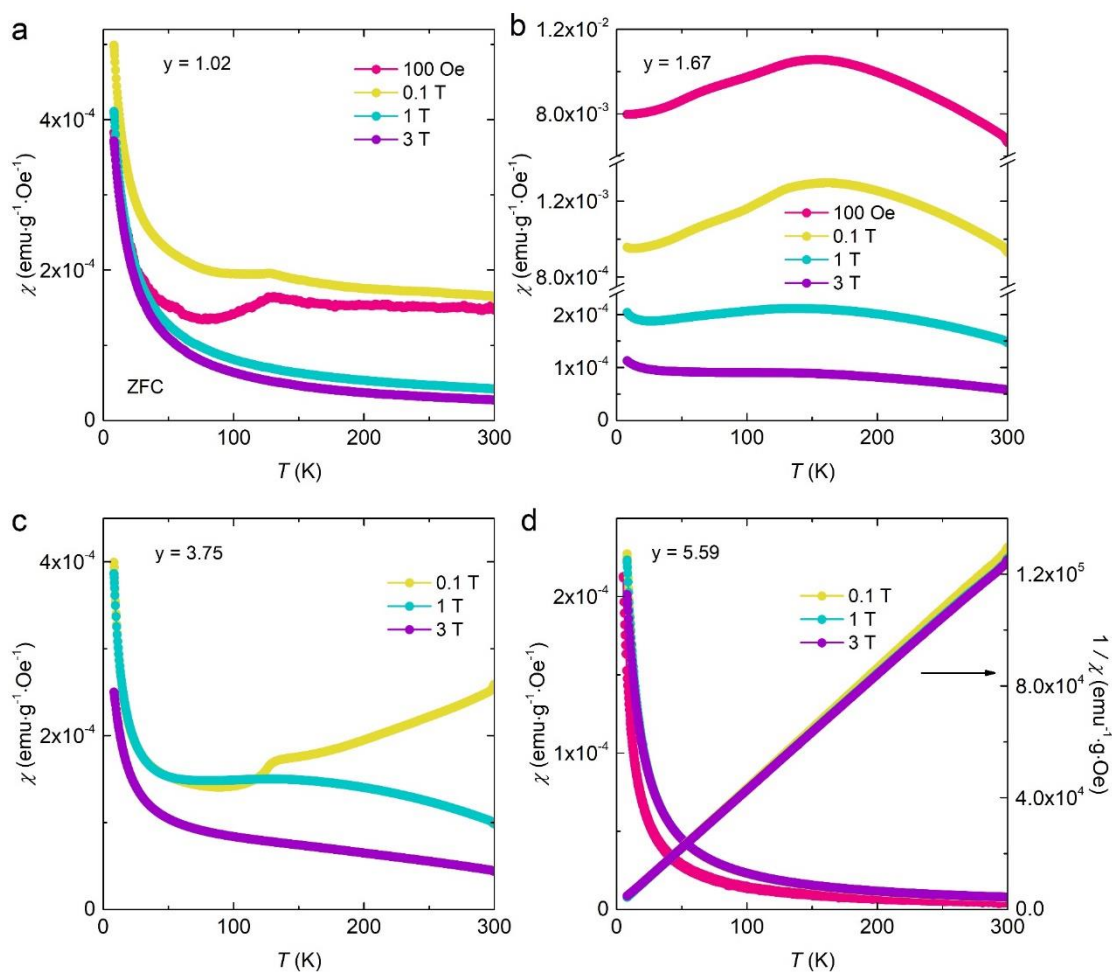

Figure S6. Temperature dependent of magnetic susceptibility of  $\text{Fe}(\text{TCNE})_y$  ( $y = 1.02, 1.67, 3.75$  and  $5.59$ ) synthesized at 368 K.

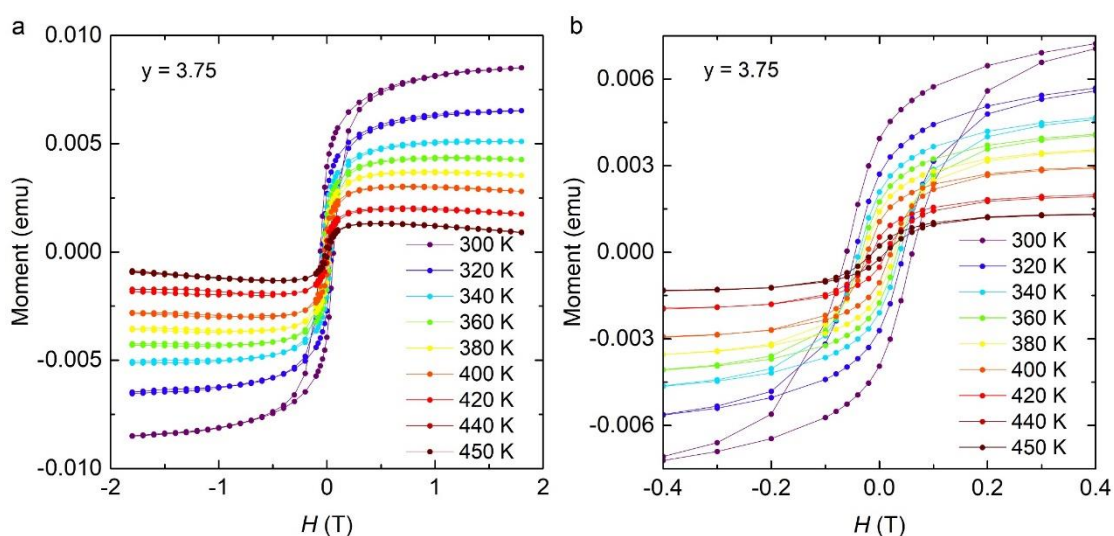

Figure S7. Magnetic field dependent of magnetization of  $\text{Fe}(\text{TCNE})_y$  ( $y = 3.75$ ) at high temperature above 300 K.

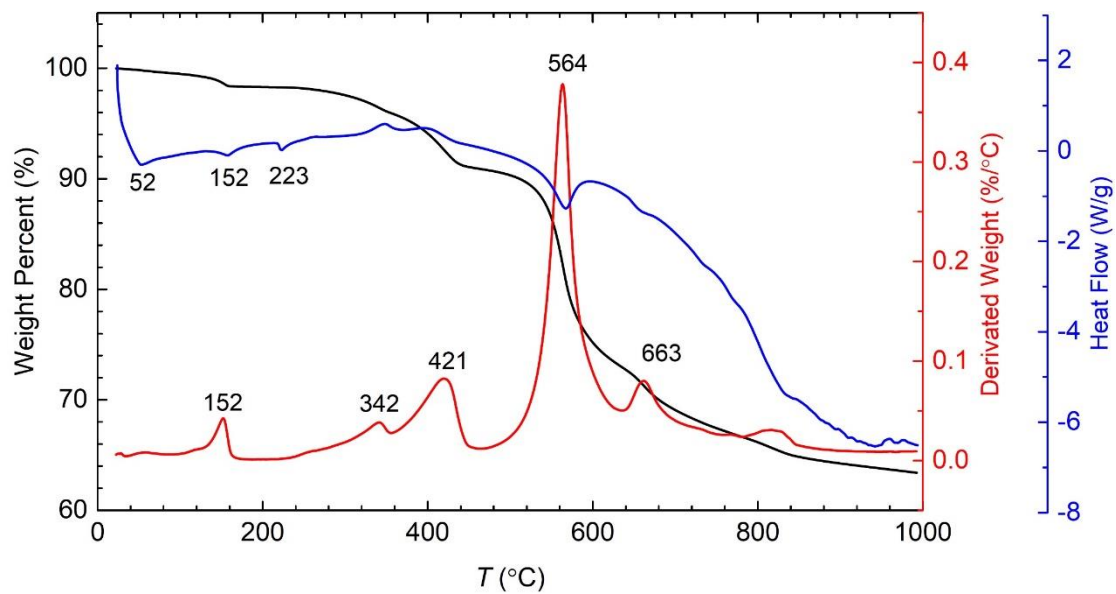

Figure S8. Thermal weigh and heat flow analysis of  $\text{Fe}(\text{TCNE})_y$ .
